# Supplementary material for: Genome-wide identification of theMADS-boxtranscription factor family in pear (Pyrus bretschneideri) reveals evolution and functional divergence
Source: PeerJ journal article supplement (doi:10.7717/peerj.3776), 2017-09-11
Supplement: Supplemental_Figure_S1.pdf [file Supplemental_Figure_S1.pdf]

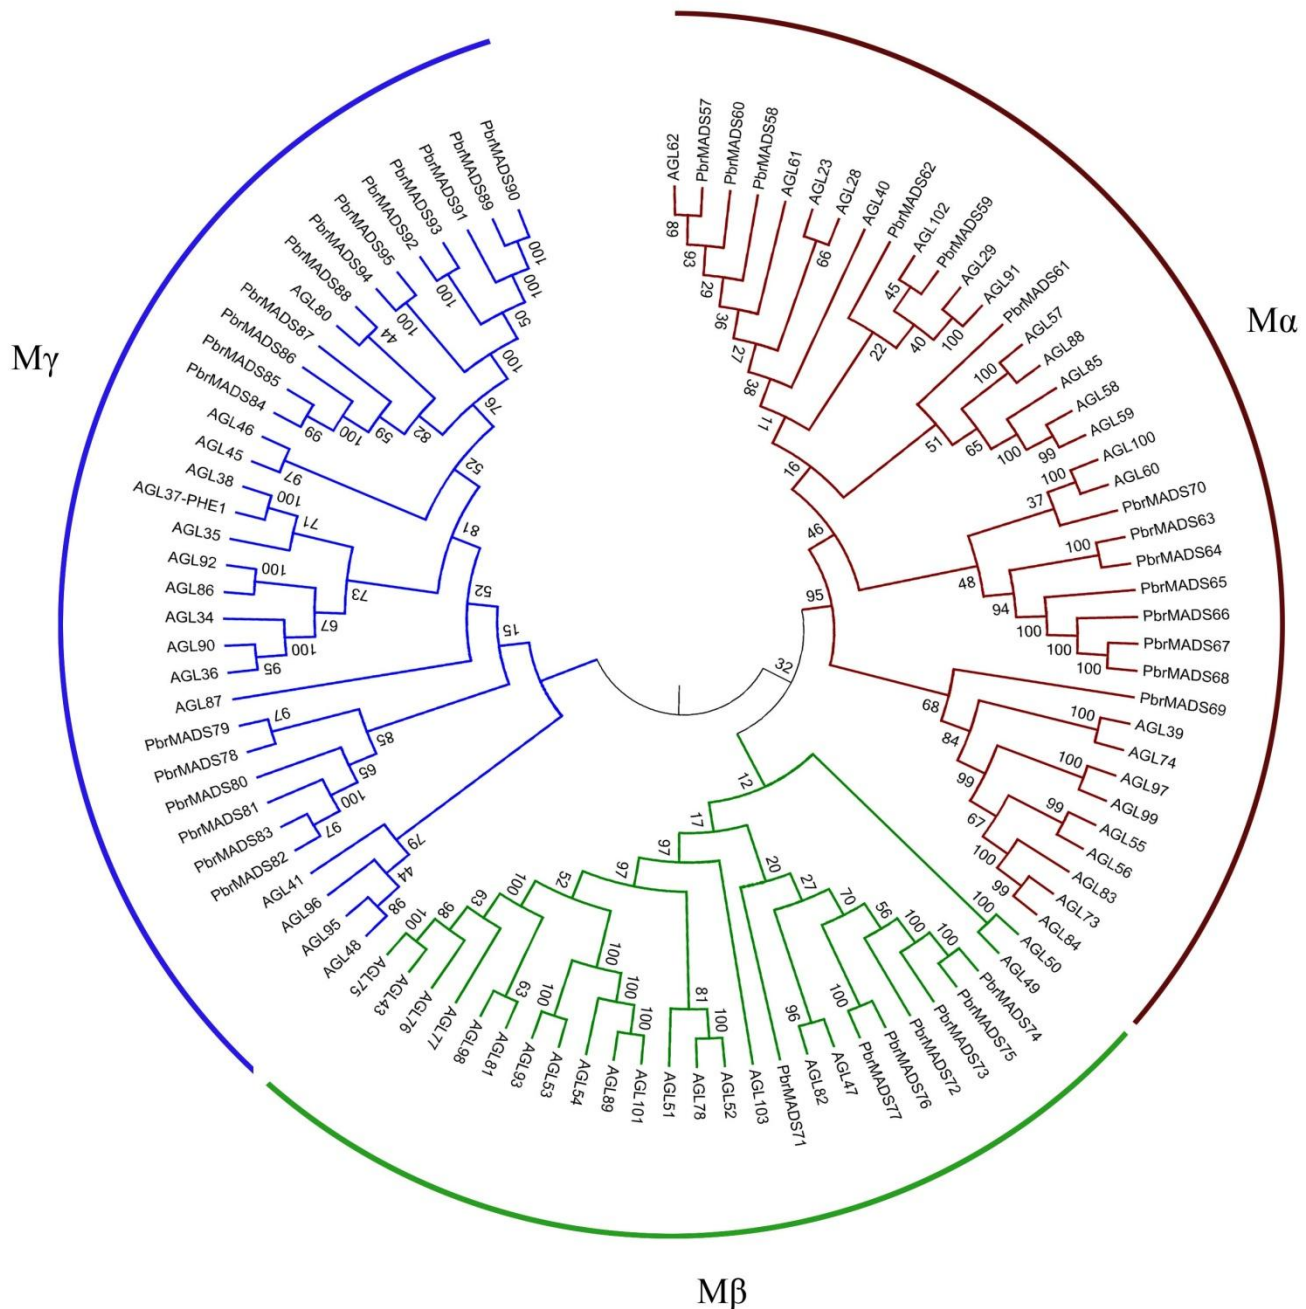

**Supplementary figure 1. Phylogenetic tree of type I *MADS-box* transcription factors in pear and *Arabidopsis*.** A total of 39 type I *MADS-box* proteins in pear and 61 in *Arabidopsis* were used to construct the NJ tree. The subgroups are indicated by different branch colors.
