# Supplementary material for: Genome-wide identification of theMADS-boxtranscription factor family in pear (Pyrus bretschneideri) reveals evolution and functional divergence
Source: PeerJ journal article supplement (doi:10.7717/peerj.3776), 2017-09-11
Supplement: Supplemental_Figure_S2.pdf [file Supplemental_Figure_S2.pdf]

(a)

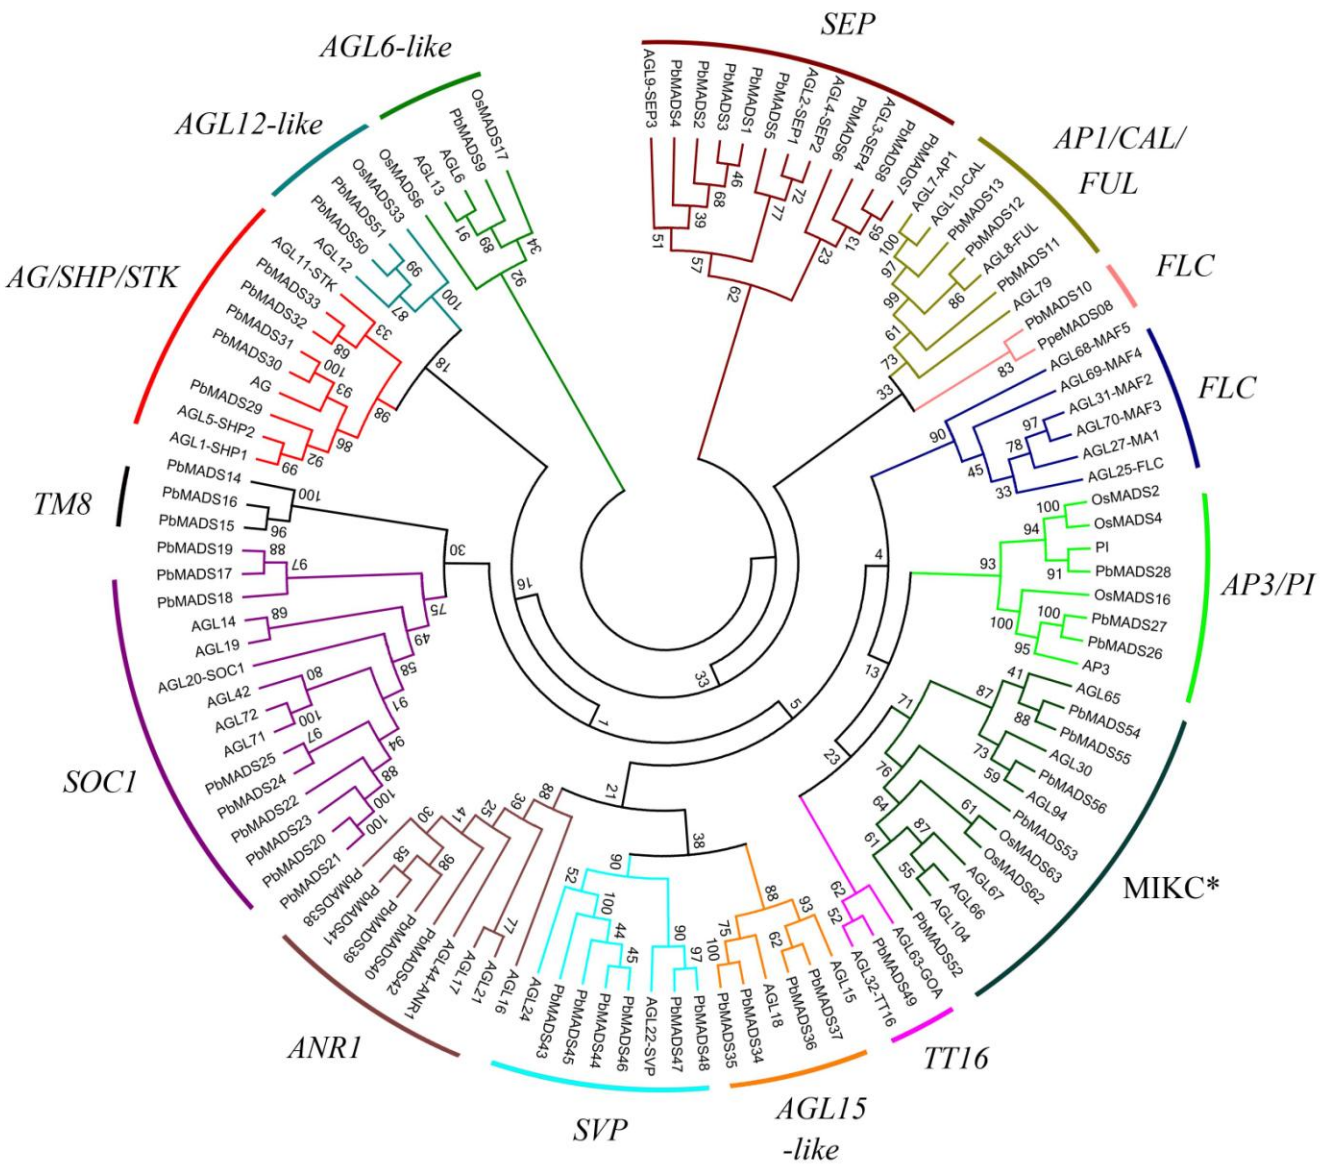

(b)

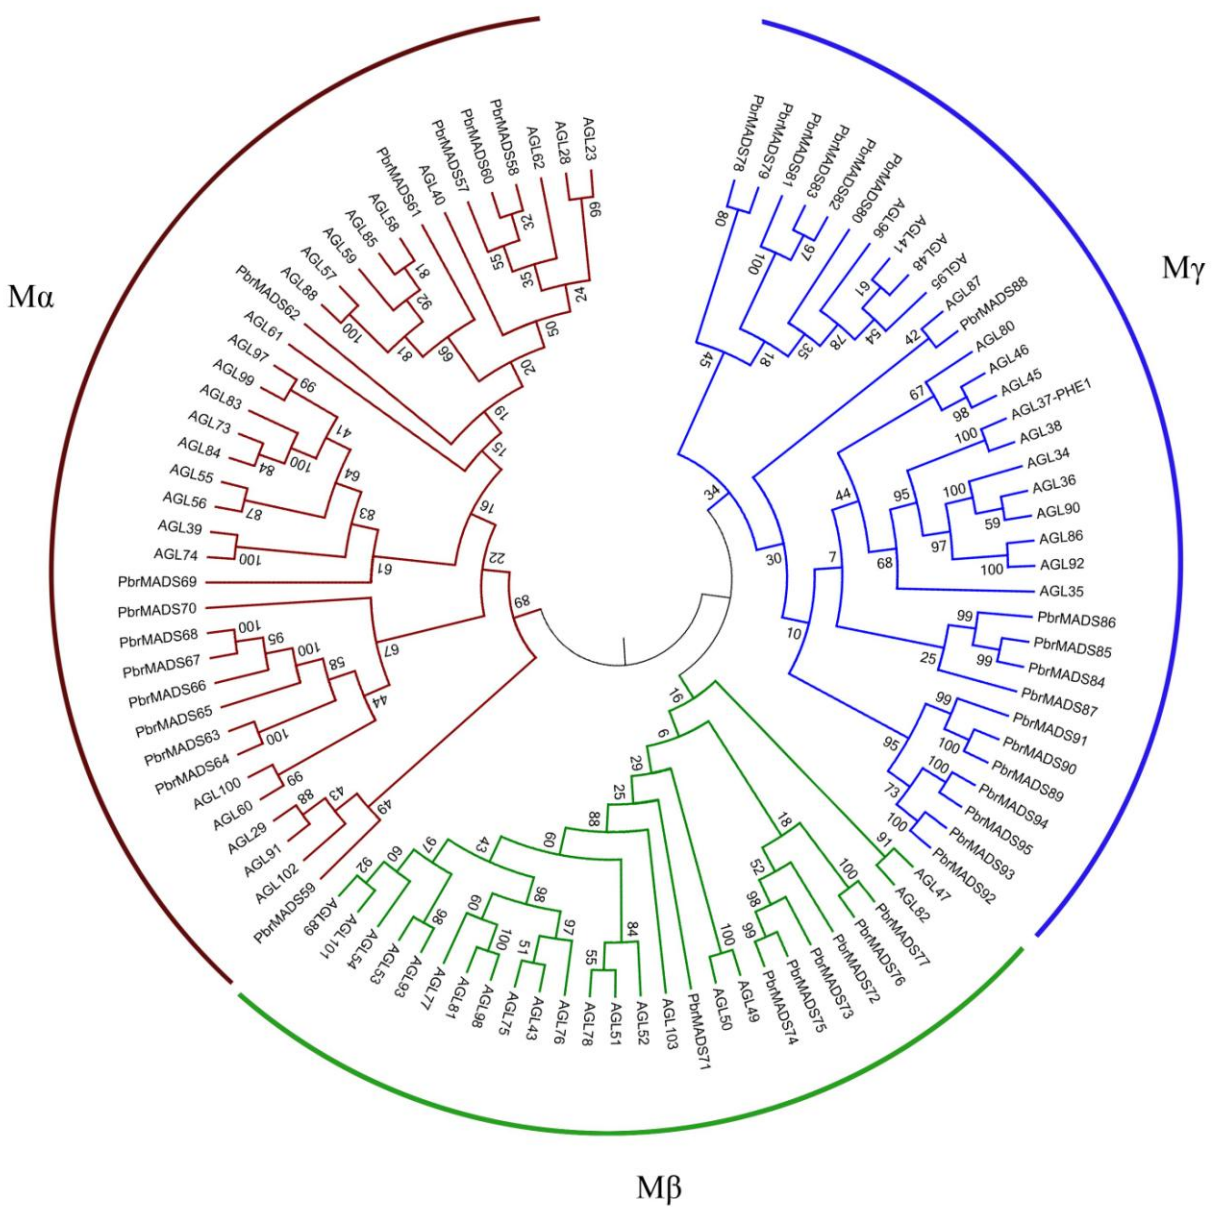

**Supplementary figure 2. Maximum likelihood trees of type I and II *MADS-box* transcription factors in pear.** (a) Tree of type II genes: a total of 56 type II *MADS-box* proteins in pear, 46 in *Arabidopsis*, and 8 in rice were used to construct the ML tree. The subgroups are indicated by different branch colors. (b) Tree of type I genes: a total of 39 type I *MADS-box* proteins in pear and 61 in *Arabidopsis* were used to construct the ML tree. The subgroups are indicated by different branch colors.
