# Supplementary material for: Genome-wide identification of theMADS-boxtranscription factor family in pear (Pyrus bretschneideri) reveals evolution and functional divergence
Source: PeerJ journal article supplement (doi:10.7717/peerj.3776), 2017-09-11
Supplement: Supplemental_Figure_S3.pdf [file Supplemental_Figure_S3.pdf]

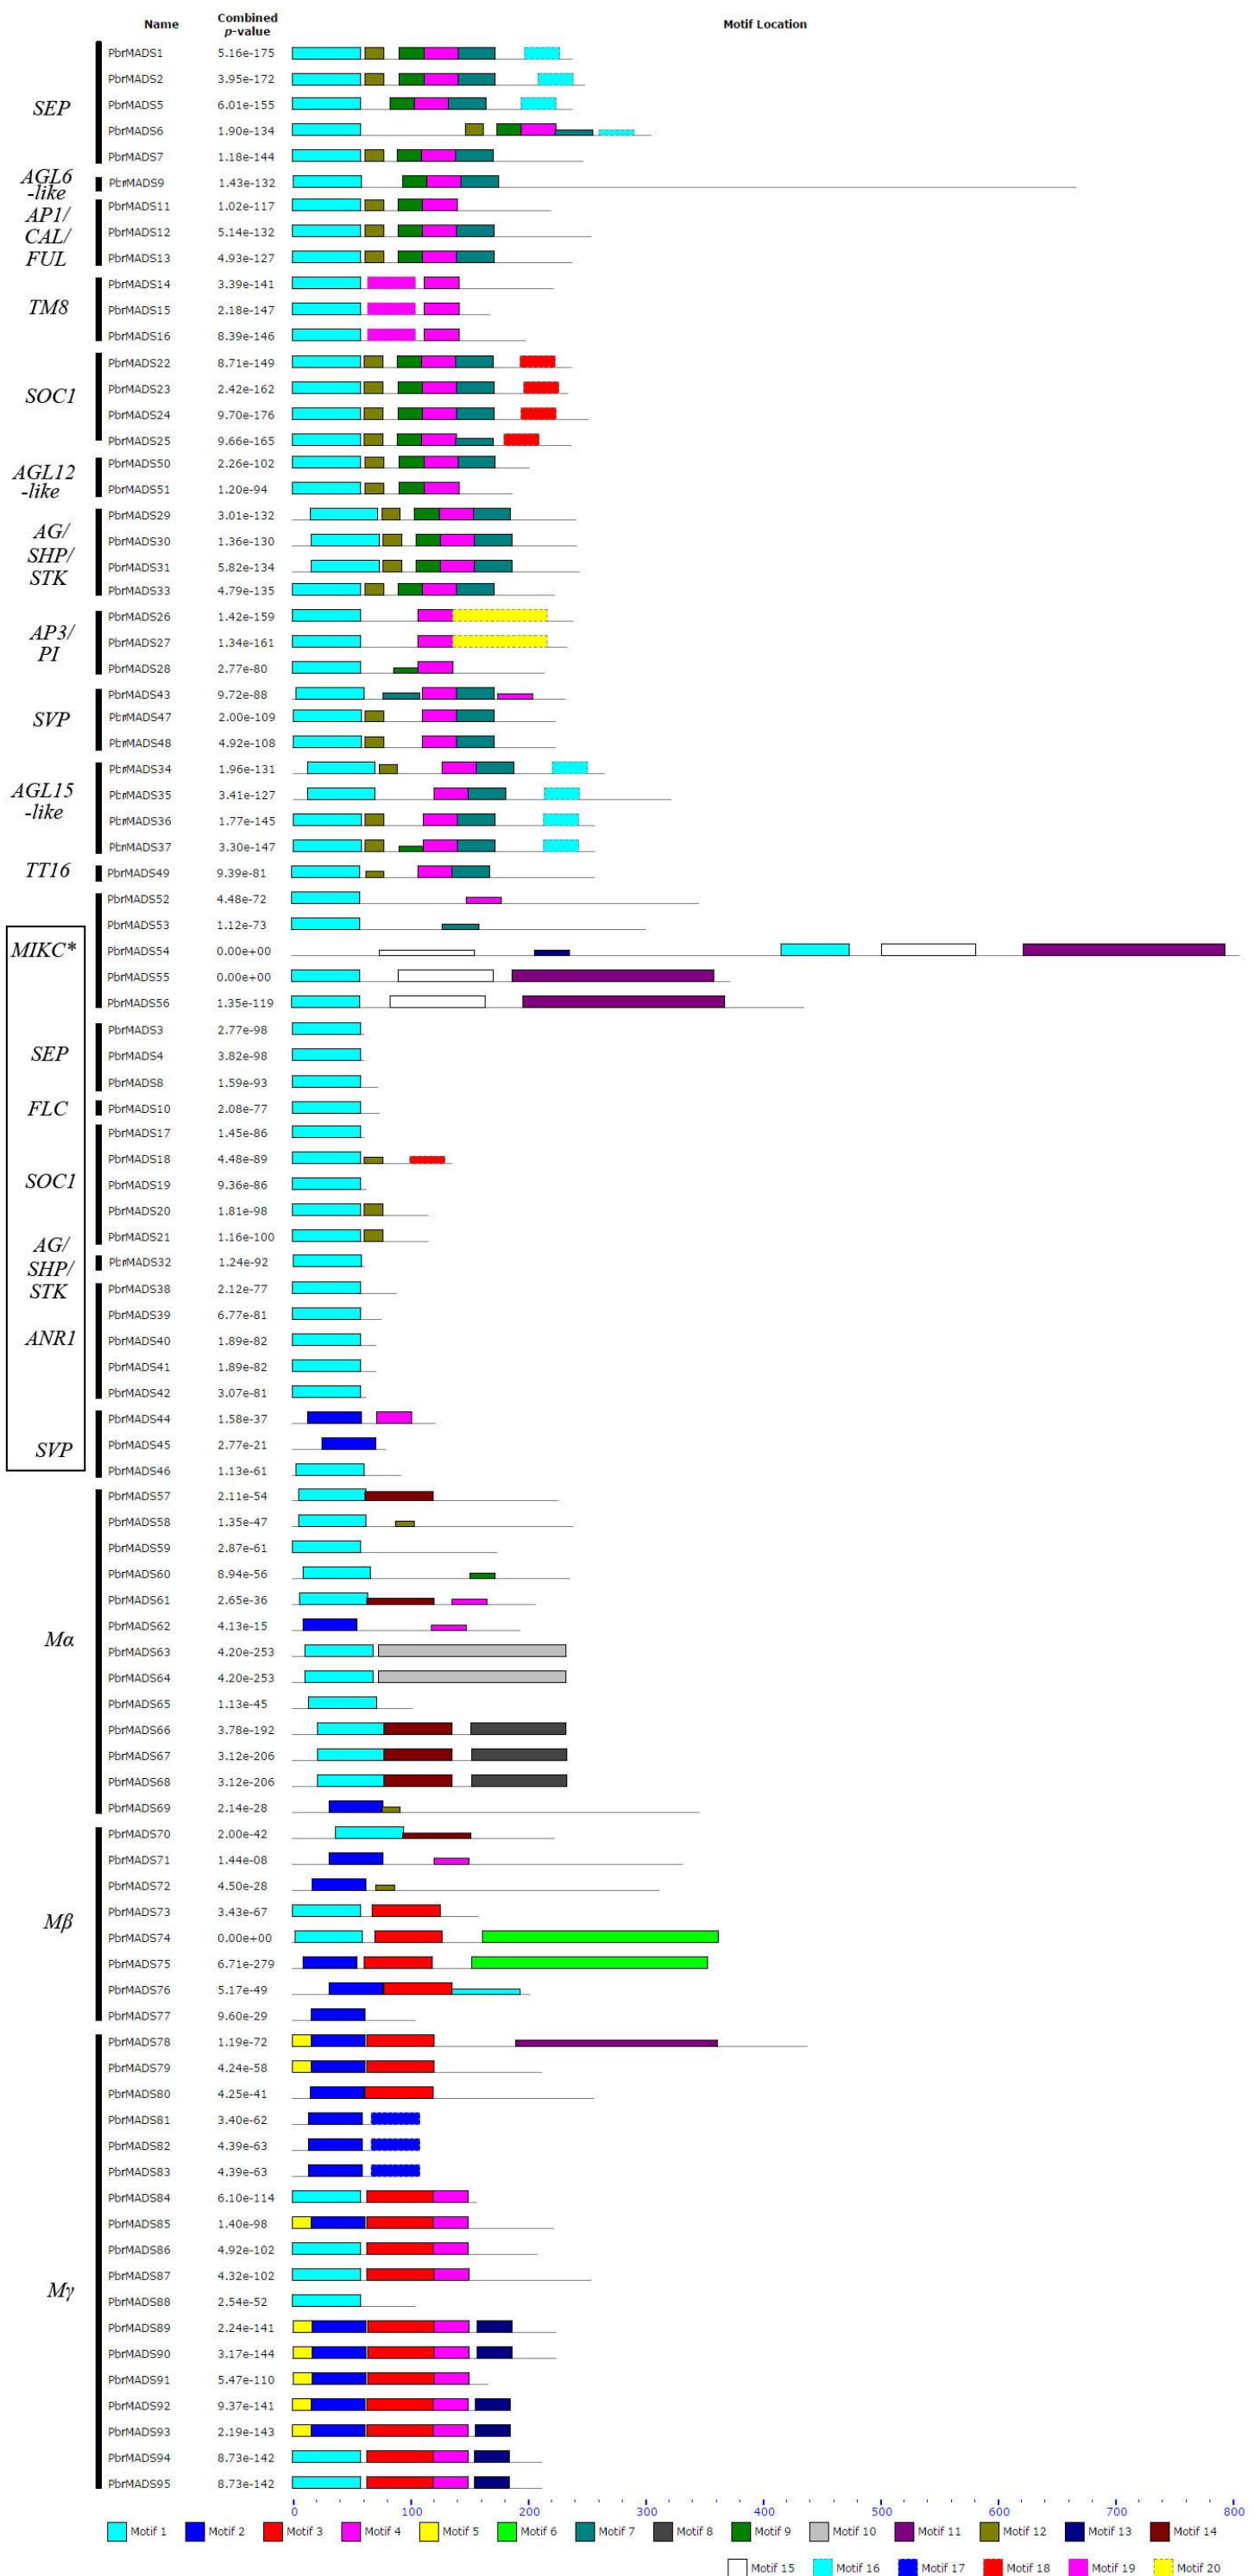

**Supplementary figure 3. Conserved motif compositions of pear *MADS-box* genes.** Different motifs are represented by different colored boxes. Motif 1 and motif 2 represent the MADS domain, Motifs 4, 7, and 9 are three fragments of the K domain. Box length represents motif length. Gene names, corresponding *P*-value and subgroup are shown on the left of figure. To better observe original motif distributions of different subfamilies, 23 intermediate form genes were removed from original subgroup and grouped. They are highlighted by a rectangle.
