# Supplementary material for: Genome-wide identification of theMADS-boxtranscription factor family in pear (Pyrus bretschneideri) reveals evolution and functional divergence
Source: PeerJ journal article supplement (doi:10.7717/peerj.3776), 2017-09-11
Supplement: Supplemental_Figure_S4.pdf [file Supplemental_Figure_S4.pdf]

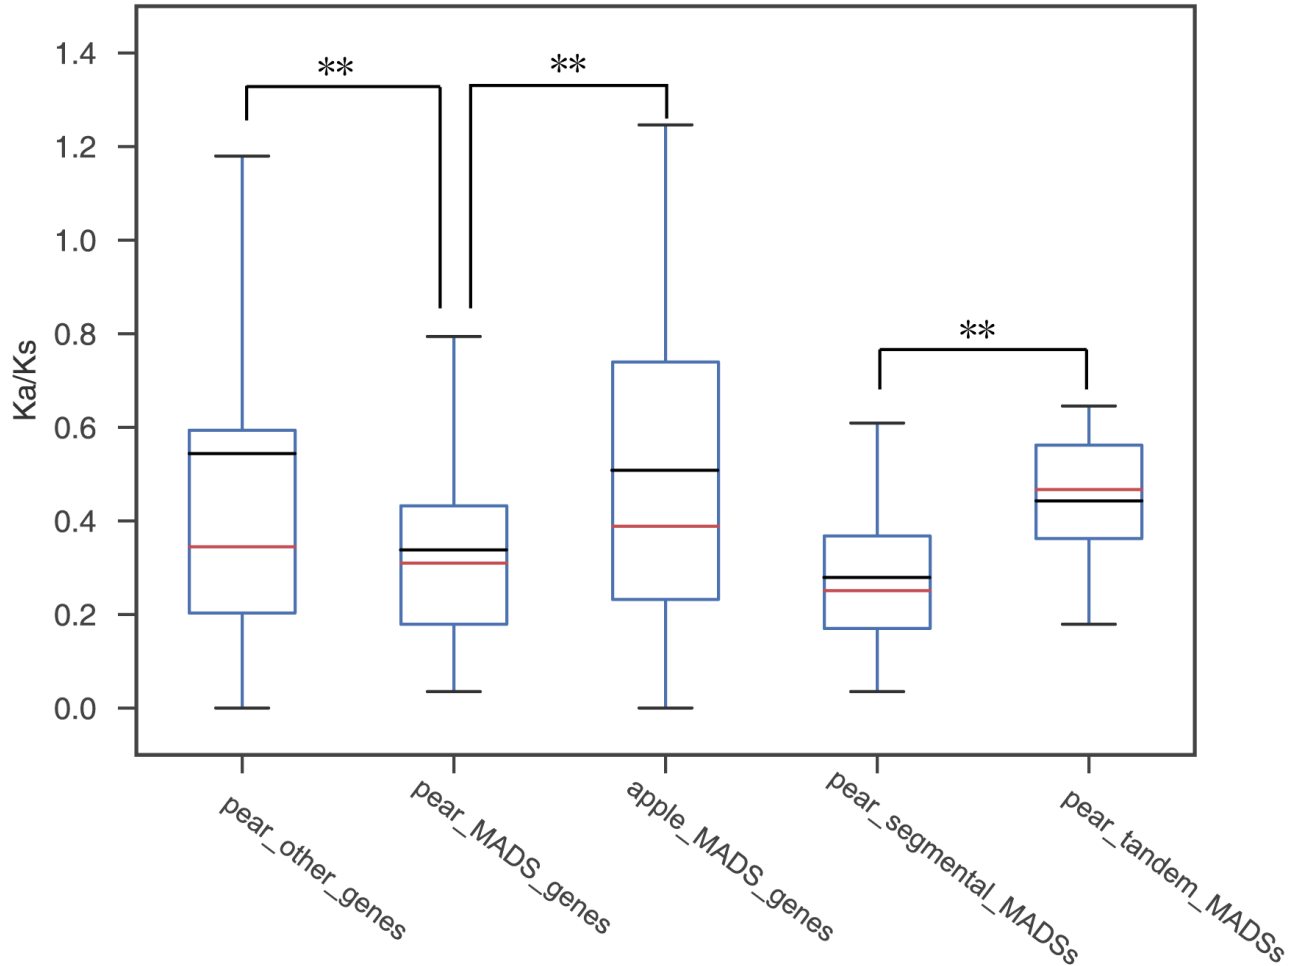

**Supplementary figure 4. Ka/Ks ratios of duplicated genes.** The boxplot shows the average value (black line in box), median value (red line in box), 1%, 25%, 75% and 99% value lines (box lines) of each data set. Double asterisks indicate significant differences between groups ( $P < 0.01$ ).
