# Supplementary material for: Genome-wide identification of theMADS-boxtranscription factor family in pear (Pyrus bretschneideri) reveals evolution and functional divergence
Source: PeerJ journal article supplement (doi:10.7717/peerj.3776), 2017-09-11
Supplement: Supplemental_Figure_S5.pdf [file Supplemental_Figure_S5.pdf]

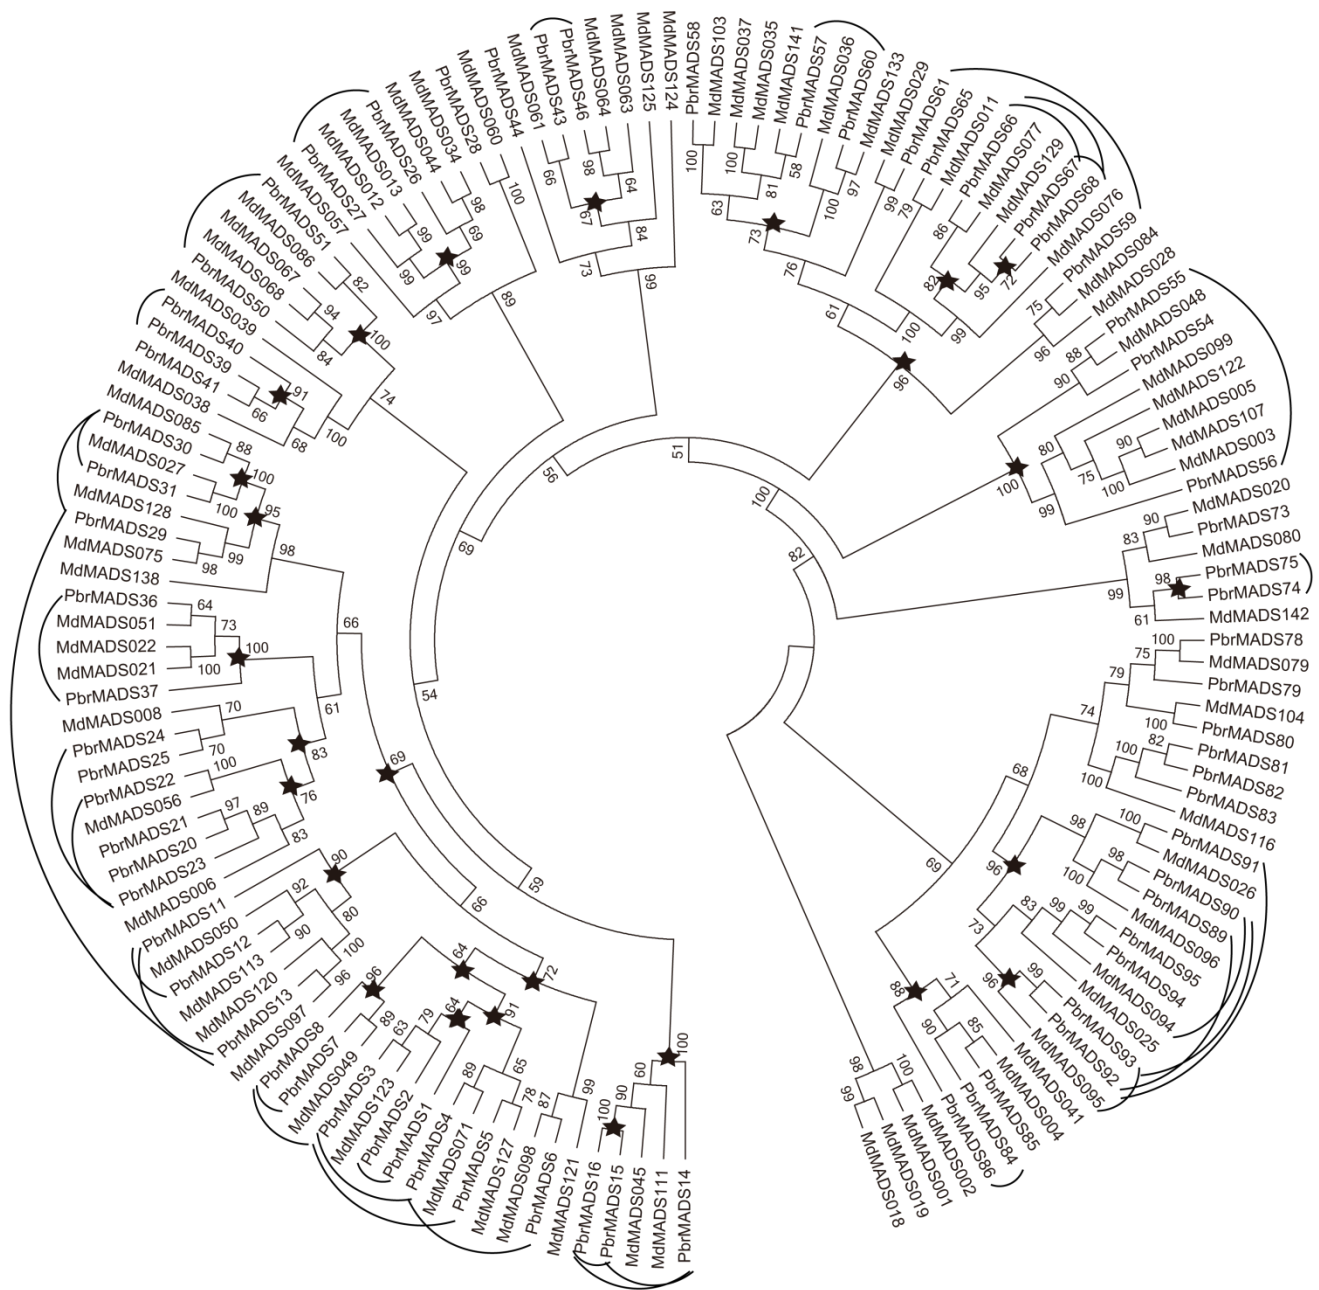

**Supplementary figure 5. ML tree of pear and apple *MADS-box* genes for the branch site model.** Curves indicate segmental or tandem duplicated gene pairs. Node for each paralogous pair marked by star symbol was designated as the foreground branch and the others as background branches, respectively.
