# Supplementary material for: Genome-wide identification of theMADS-boxtranscription factor family in pear (Pyrus bretschneideri) reveals evolution and functional divergence
Source: PeerJ journal article supplement (doi:10.7717/peerj.3776), 2017-09-11
Supplement: Supplemental_Figure_S6.pdf [file Supplemental_Figure_S6.pdf]

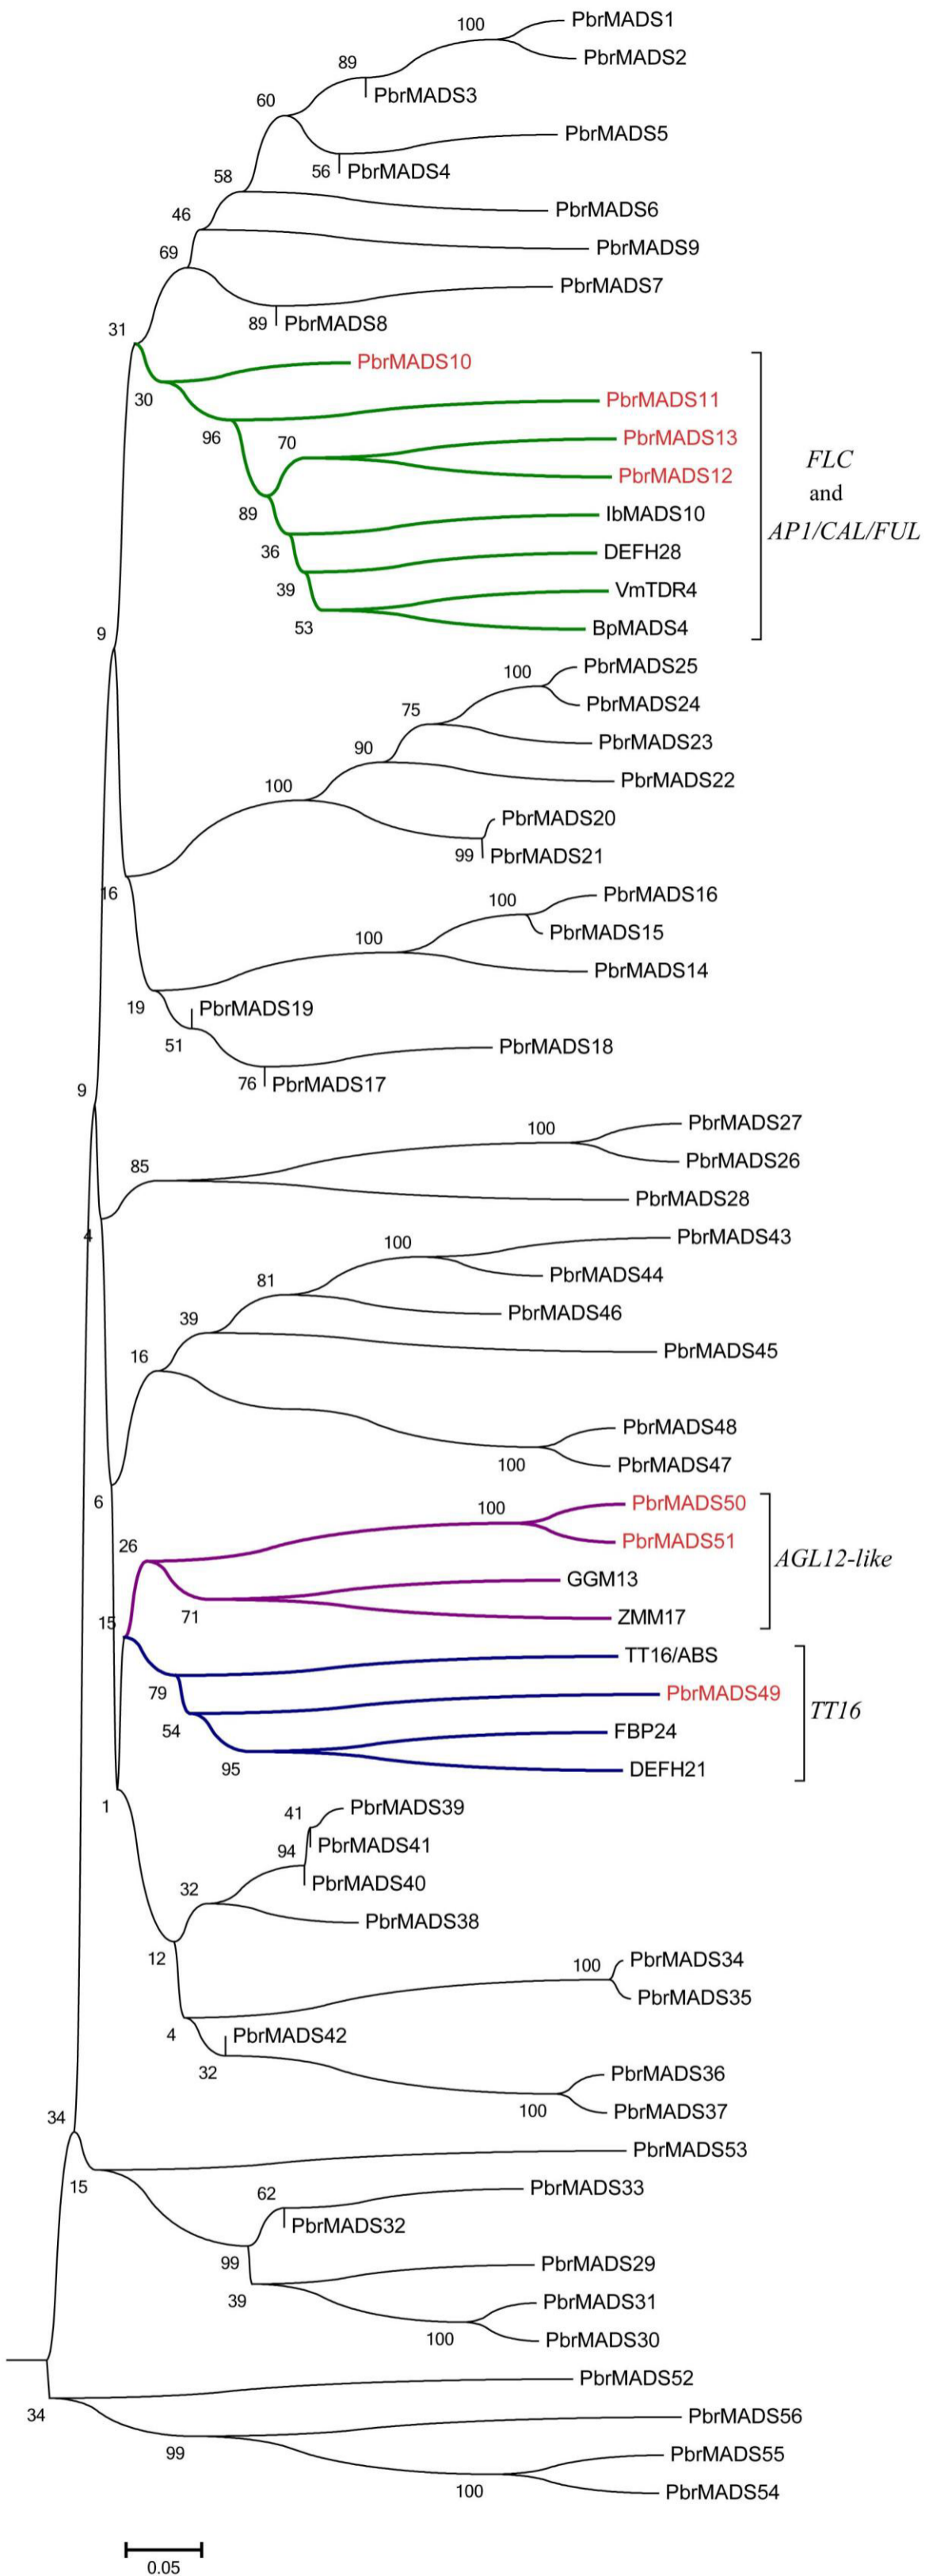

**Supplementary figure 6. Phylogenetic tree of anthocyanin biosynthesis-related genes and type II *PbrMADS* genes.** The tree was constructed using MEGA6.
