# Supplementary material for: Genome-wide identification of theMADS-boxtranscription factor family in pear (Pyrus bretschneideri) reveals evolution and functional divergence
Source: PeerJ journal article supplement (doi:10.7717/peerj.3776), 2017-09-11
Supplement: Supplemental_Figure_S7.pdf [file Supplemental_Figure_S7.pdf]

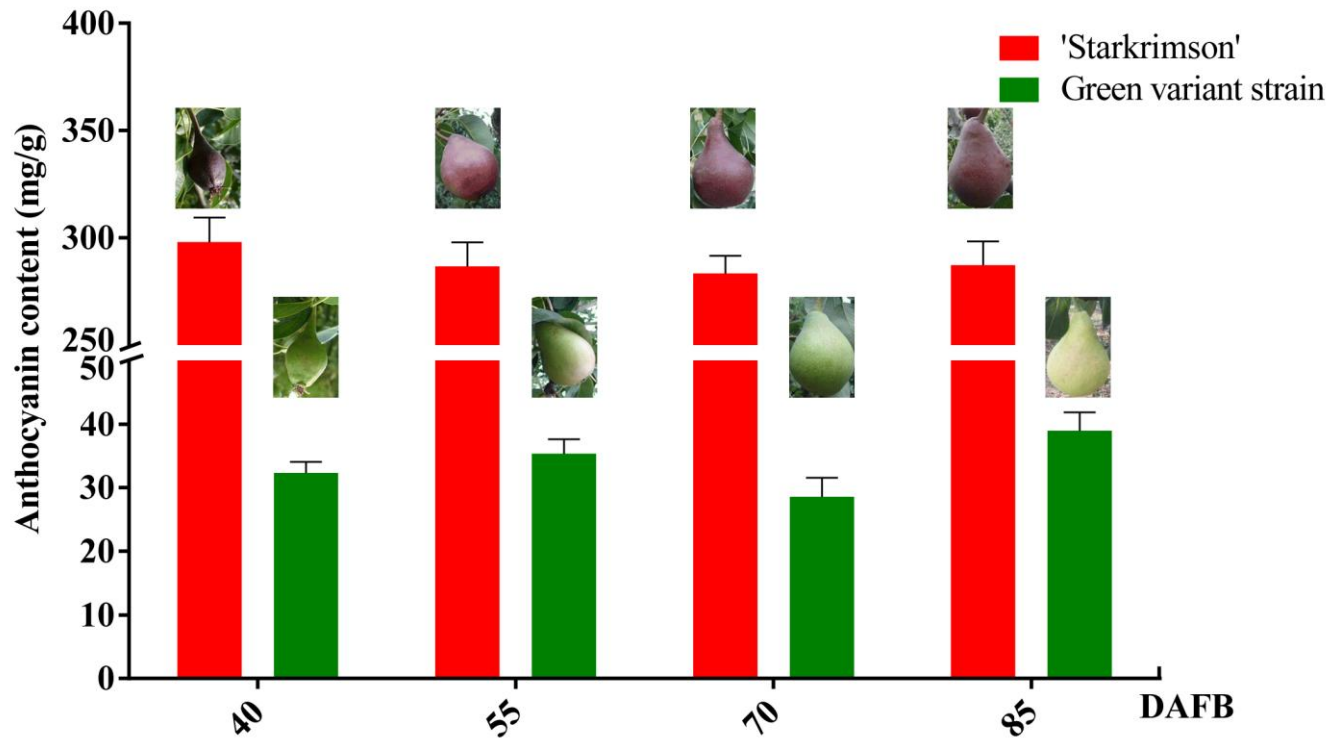

**Supplementary figure 7.** Anthocyanin content and coloration of fruit in the ‘Starkrimson’ and green strain at 40, 55, 70, and 85 DAFB.
