# Supplementary material for: Genome-wide identification of theMADS-boxtranscription factor family in pear (Pyrus bretschneideri) reveals evolution and functional divergence
Source: PeerJ journal article supplement (doi:10.7717/peerj.3776), 2017-09-11
Supplement: Supplemental_Figure_S8.pdf [file Supplemental_Figure_S8.pdf]

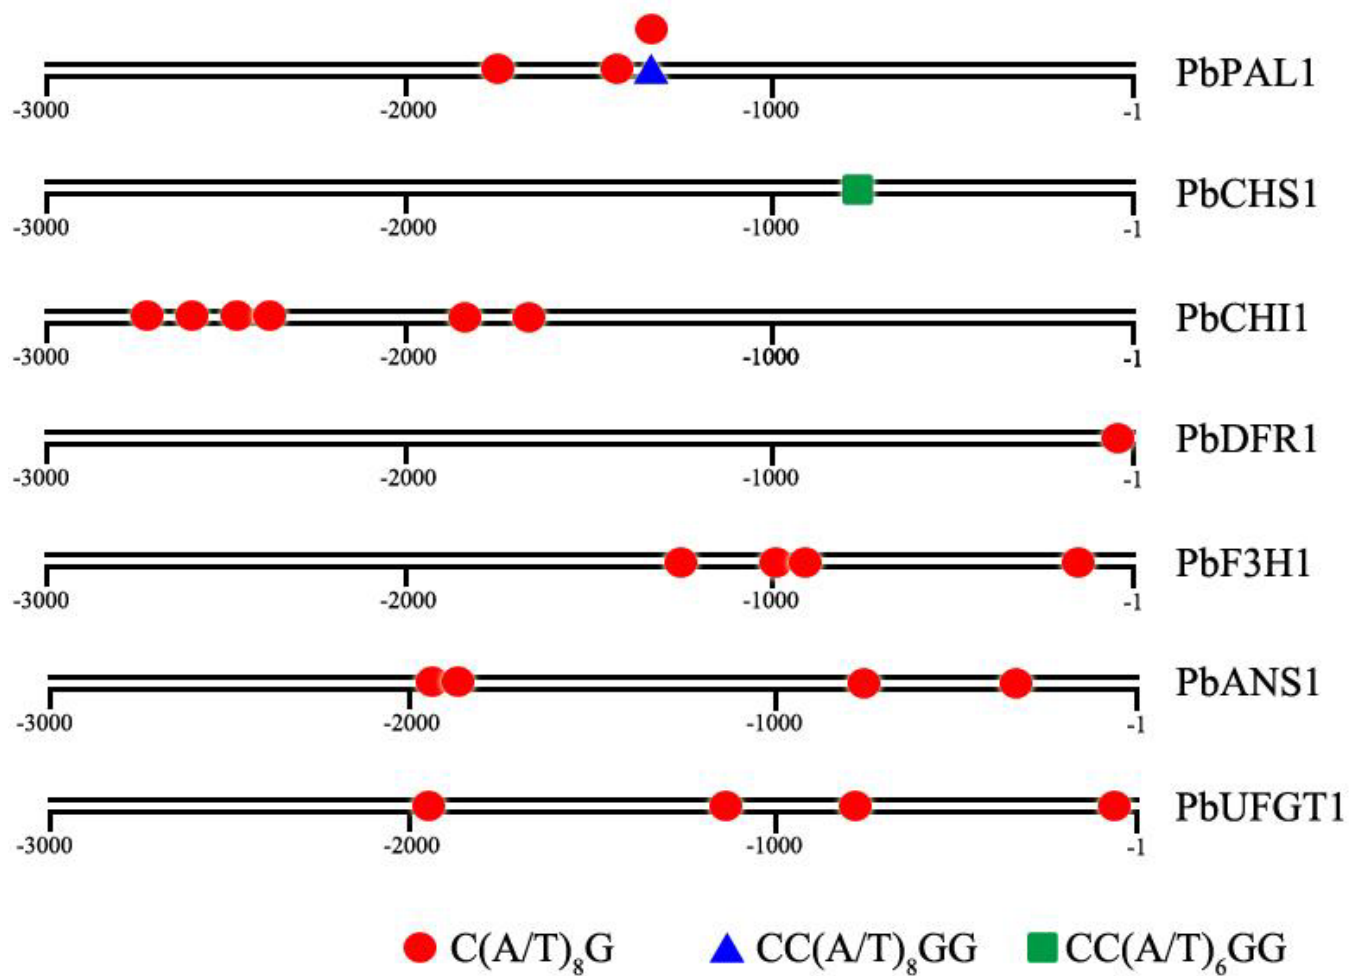

Supplementary figure 8. *In silico* cis-element prediction of seven anthocyanin biosynthesis genes.
